# Supplementary material for: Prevention of Post-Hepatectomy Liver Failure in Cirrhotic Patients Undergoing Minimally Invasive Liver Surgery for HCC: Has the Round Ligament to Be Preserved?
Source: MDPI journal article supplement (doi:10.3390/cancers16020364), 2024-01-15
Supplement: s1 [file s1]

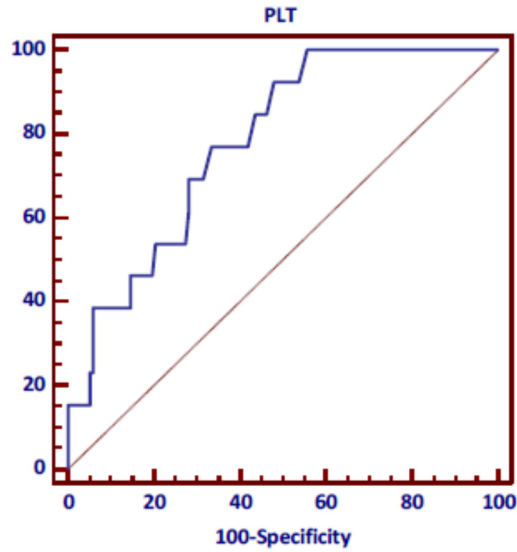

**Figure S1.** ROC curve analysis of the platelets (PLT) count [ $< 92 \times 103/\mu\text{L}$  (AUC = 0.781,  $p = <0.001$ )] predictive for postoperative ascites.

**Table S1.** Baseline and procedure characteristics of patients undergoing laparoscopic liver resections with Round Ligament (RL) preservation and RL division excluding patients converted to open surgery.

| Patient characteristics                        | RL divided<br>(n = 31) | RL preserved<br>(n = 85) | <i>p</i> |
|------------------------------------------------|------------------------|--------------------------|----------|
| <b>Preoperative characteristics</b>            |                        |                          |          |
| Age, years (IQR)                               | 65 (58 - 72)           | 68 (60 - 75)             | 0.101    |
| Sex, male (%)                                  | 22 (71%)               | 64 (75.3%)               | 0.638    |
| BMI, kg/m <sup>2</sup> (IQR)                   | 24 (24 - 28)           | 25 (25 - 29)             | 0.178    |
| ASA grade                                      |                        |                          | 0.308    |
| ASA 1 (%)                                      | 0                      | 0                        |          |
| ASA 2 (%)                                      | 18 (58.1%)             | 58 (68.2%)               |          |
| ASA 3 (%)                                      | 13 (41.9%)             | 27 (31.8%)               |          |
| ASA 4 (%)                                      | 0                      | 0                        |          |
| Grade of Cirrhosis                             |                        |                          | 0.965    |
| Child Pugh A (%)                               | 26 (83.9%)             | 71 (83.5%)               |          |
| Child Pugh B (%)                               | 5 (16.1%)              | 14 (16.5%)               |          |
| Etiology of Cirrhosis                          |                        |                          | 0.290    |
| Alcohol (%)                                    | 1 (3.2%)               | 15 (17.6%)               |          |
| HCV (%)                                        | 13 (41.9%)             | 34 (40%)                 |          |
| HBV (%)                                        | 5 (16.1%)              | 11 (12.9%)               |          |
| Metabolic (%)                                  | 5 (16.1%)              | 14 (16.5%)               |          |
| Other (%)                                      | 7 (22.6%)              | 11 (12.9%)               |          |
| ICG-R15 (IQR)                                  | 15.0 (12 - 17)         | 15.5 (13 - 19)           | 0.780    |
| Platelets count $\times 103/\mu\text{L}$ (IQR) | 104 (86 - 119)         | 107 (90 - 120)           | 0.390    |
| Previous abdominal surgery (%)                 | 18 (58.1%)             | 38 (44.7%)               | 0.203    |
| Previous liver surgery (%)                     | 7 (22.6%)              | 15 (17.6%)               | 0.549    |
| Number of nodules (IQR)                        | 1 (1 - 1)              | 1 (1 - 1)                | 0.976    |
| Max. nodule size, mm (IQR)                     | 30 (17 - 37)           | 25 (14 - 33)             | 0.314    |
| <b>Intraoperative Characteristics</b>          |                        |                          |          |
| Type of Resection                              |                        |                          | 0.180    |
| Non-anatomic resection (%)                     | 10 (32.3%)             | 42 (49.4%)               |          |
| Segmentectomy (%)                              | 14 (45.2%)             | 34 (40.0%)               |          |
| Left lateral sectionectomy (%)                 | 6 (19.4%)              | 5 (5.9%)                 |          |
| Right posterior sectionectomy (%)              | 1 (3.2%)               | 4 (4.7%)                 |          |

|                                     |                 |                 |       |
|-------------------------------------|-----------------|-----------------|-------|
| Pringle manoeuvre (%)               | 26 (83.9%)      | 73 (85.9%)      | 0.786 |
| Duration of Pringle man., min (IQR) | 36 (17 - 65)    | 34 (15 - 40)    | 0.969 |
| Operative time, min (IQR)           | 315 (216 – 380) | 264 (195 – 300) | 0.091 |
| Blood loss, cc (IQR)                | 100 (30 – 200)  | 100 (20 – 170)  | 0.868 |

Abbreviations: ASA, American Society of Anesthesiology; BMI, body mass index; IQR, inter quartile range, ICG-R15, Indocyanine green – retention rate at 15 min; HCV, hepatitis c virus; HBV, hepatitis B virus.

**Table S2.** Postoperative outcomes of patients undergoing laparoscopic liver resections with Round Ligament (RL) preservation and RL division excluding patients converted to open surgery.

| Postoperative Outcomes                  | RL divided<br>(n = 31) | RL preserved<br>(n = 85) | p     |
|-----------------------------------------|------------------------|--------------------------|-------|
| Postoperative complication-30 days¥ (%) | 14 (45.2%)             | 24 (28.2%)               | 0.086 |
| Severe, grade 3-5 (%)                   | 4 (12.9%)              | 10 (11.8%)               | 0.868 |
| Postoperative complication-90 days¥ (%) | 14 (45.2%)             | 26 (30.6%)               | 0.144 |
| Post Hepatectomy Liver Failure* (%)     | 9 (29.0%)              | 8 (9.4%)                 | 0.008 |
| Severe, grade B-C (%)                   | 6 (19.4 %)             | 6 (7.1 %)                | 0.049 |
| Ascites (%)                             | 6 (19.4%)              | 5 (5.9%)                 | 0.028 |
| 30-days readmission (%)                 | 1 (3.2%)               | 5 (5.9%)                 | 0.568 |
| ICU Stay, days (IQR)                    | 1 (0 – 1)              | 1 (0 – 1)                | 0.593 |
| Hospital stay, days (IQR)               | 5 (4 – 7)              | 5 (4 – 5)                | 0.596 |

IQR = inter quartile range, \* ISGLS definition (International study group for liver surgery), ¥ Clavien-Dindo Classification.

**Table S3.** Uni and Multivariate analysis of risk factors associated with the development of post-operative ascites in the whole population excluding patients converted to open surgery.

| ASCITES<br>Predictive factors         | Univariate Analysis     |       | Multivariate Analysis   |       |
|---------------------------------------|-------------------------|-------|-------------------------|-------|
|                                       | Odds Ratio (95% CI)     | p     | Odds Ratio (95% CI)     | p     |
| <b>Preoperative characteristics</b>   |                         |       |                         |       |
| Age, years                            | 0.980 (0.928 to 1.035)  | 0.467 |                         |       |
| Sex, male                             | 0.375 (0.105 to 1.334)  | 0.130 |                         |       |
| BMI, kg/m <sup>2</sup>                | 1.012 (0.870 to 1.176)  | 0.880 |                         |       |
| ASA grade                             |                         |       |                         |       |
| ASA 2                                 |                         |       |                         |       |
| ASA 3                                 | 3.654 (1.001 to 13.338) | 0.050 | 2.500 (0.624 to 10.011) | 0.196 |
| Grade of Cirrhosis                    |                         |       |                         |       |
| Child Pugh A                          |                         |       |                         |       |
| Child Pugh B                          | 3.429 (1.004 to 13.154) | 0.047 | 1.953 (0.362 to 10.544) | 0.437 |
| Etiology of Cirrhosis                 |                         |       |                         |       |
| Alcohol                               |                         |       |                         |       |
| HCV                                   | 0.758 (0.171 to 3.366)  | 0.716 |                         |       |
| HBV                                   | 1.001 (0.999 to 1.002)  | 0.998 |                         |       |
| Metabolic                             | 0.241 (0.022 to 2.583)  | 0.240 |                         |       |
| Other                                 | 1.000 (0.999 to 1.000)  | 0.999 |                         |       |
| ICG-R15 (IQR)                         | 1.004 (0.881 to 1.090)  | 0.585 |                         |       |
| Platelets count x10 <sup>3</sup> /µL  | 0.900 (0.983 to 1.005)  | 0.045 | 0.994 (0.981 to 1.088)  | 0.430 |
| Previous abdominal surgery            | 0.882 (0.254 to 3.070)  | 0.844 |                         |       |
| Previous liver surgery                | 0.944 (0.189 to 4.714)  | 0.944 |                         |       |
| Number of nodules                     | 0.223 (0.018 to 2.796)  | 0.245 |                         |       |
| Max. nodule size, mm                  | 1.003 (0.965 to 1.042)  | 0.890 |                         |       |
| <b>Intraoperative Characteristics</b> |                         |       |                         |       |
| Round Ligament divided                | 3.840 (1.080 to 13.659) | 0.038 | 4.054 (1.016 to 16.181) | 0.047 |
| Type of Resection                     |                         |       |                         |       |
| Non-anatomic resection                |                         |       |                         |       |
| Segmentectomy                         | 0.429 ( 0.104 to 1.763) | 0.240 |                         |       |
| Left lateral sectionectomy            | 0.999 ( 0.998 to 1.002) | 0.995 |                         |       |
| Right posterior sectionectomy         | 1.607 (0.156 to 16.543) | 0.690 |                         |       |
| Pringle manoeuvre                     | 1.001 (0.999 to 1.002)  | 0.998 |                         |       |
| Duration of Pringle man., min         | 0.997 (0.984 to 1.011)  | 0.698 |                         |       |
| Operative time, min                   | 1.001 (0.995 to 1.007)  | 0.705 |                         |       |

|                |                        |       |
|----------------|------------------------|-------|
| Blood loss, cc | 1.001 (0.099 to 1.002) | 0.358 |
|----------------|------------------------|-------|

Abbreviations: ASA, American Society of Anesthesiology; BMI, body mass index; IQR, inter quartile range, ICG-R15, Indocyanine green – retention rate at 15 min; HCV, hepatitis c virus; HBV, hepatitis B virus.
